# Supplementary material for: The Oncogenic and Tumor Suppressive Long Non-Coding RNA–microRNA–Messenger RNA Regulatory Axes Identified by Analyzing Multiple Platform Omics Data from Cr(VI)-Transformed Cells and Their Implications in Lung Cancer
Source: MDPI journal article supplement (doi:10.3390/biomedicines10102334), 2022-09-20
Supplement: s1 [file s1]

## Supplementary data

Table S1. The significant gene ontology terms (MF, BP and CC) of DE lncRNAs between BEAS-2B-Cr (VI) and BEAS-2B.

| Source | Term name                                   | Term ID    | P value    | ES         | size |
|--------|---------------------------------------------|------------|------------|------------|------|
| GO:MF  | DNA binding                                 | GO:0003677 | 0.00055784 | 3.25349268 | 8    |
| GO:MF  | nucleic acid binding                        | GO:0003676 | 0.00046400 | 3.33348389 | 15   |
| GO:MF  | catalytic activity                          | GO:0003824 | 0.00039410 | 3.40438916 | 24   |
| GO:MF  | heterocyclic compound binding               | GO:1901363 | 0.00031208 | 3.50573022 | 22   |
| GO:MF  | adenyl nucleotide binding                   | GO:0030554 | 0.00021264 | 3.67236525 | 8    |
| GO:MF  | binding                                     | GO:0005488 | 0.00015901 | 3.79858485 | 49   |
| GO:MF  | ion binding                                 | GO:0043167 | 0.00007596 | 4.11942865 | 18   |
| GO:MF  | transcription cis-regulatory region binding | GO:0000976 | 0.00006833 | 4.16540765 | 6    |
| GO:MF  | RNA binding                                 | GO:0003723 | 0.00003405 | 4.46783891 | 9    |
| GO:MF  | molecular function regulator                | GO:0098772 | 0.00001965 | 4.70654419 | 7    |
| GO:CC  | endomembrane system                         | GO:0012505 | 0.00040385 | 3.39378099 | 10   |
| GO:CC  | organelle                                   | GO:0043226 | 0.00032433 | 3.48901288 | 55   |
| GO:CC  | intracellular organelle                     | GO:0043229 | 0.00016127 | 3.79244641 | 52   |
| GO:CC  | membrane-bounded organelle                  | GO:0043227 | 0.00008153 | 4.08868256 | 53   |
| GO:CC  | protein-containing complex                  | GO:0032991 | 0.00006595 | 4.18078520 | 18   |
| GO:CC  | cytosol                                     | GO:0005829 | 0.00005734 | 4.24157791 | 14   |
| GO:CC  | nucleolus                                   | GO:0005730 | 0.00003527 | 4.45261067 | 10   |
| GO:CC  | membrane                                    | GO:0016020 | 0.00000999 | 5.00043016 | 29   |
| GO:CC  | intracellular anatomical structure          | GO:0005622 | 0.00000647 | 5.18918299 | 59   |
| GO:CC  | Mitochondrion                               | GO:0005739 | 0.00000562 | 5.25047084 | 12   |
| GO:BP  | gene silencing by miRNA                     | GO:0035195 | 0.00082850 | 3.08170882 | 22   |
| GO:BP  | cellular component organization             | GO:0016043 | 0.00009241 | 4.03426397 | 22   |
| GO:BP  | RNA metabolic process                       | GO:0016070 | 0.00004858 | 4.31358719 | 20   |
| GO:BP  | negative regulation of gene expression      | GO:0010629 | 0.00003478 | 4.45868773 | 27   |
| GO:BP  | localization                                | GO:0051179 | 0.00003401 | 4.46838042 | 16   |
| GO:BP  | signaling                                   | GO:0023052 | 0.00000501 | 5.30059592 | 22   |
| GO:BP  | negative regulation of metabolic process    | GO:0010605 | 0.00000474 | 5.32455438 | 10   |
| GO:BP  | cell cycle                                  | GO:0007049 | 0.00000095 | 6.02045163 | 6    |
| GO:BP  | metabolic process                           | GO:0008152 | 0.00000089 | 6.05119107 | 65   |
| GO:BP  | cellular process                            | GO:0009987 | 0.00000023 | 6.64662143 | 69   |

Table S2. List of gene ontology keywords the (MF, BP and CC) of the DE miRNAs between BEAS-2B-Cr (VII) and BEAS-2B.

| Source | Term name                                   | Term ID     | P value    | ES         | size |
|--------|---------------------------------------------|-------------|------------|------------|------|
| GO:MF  | cation binding                              | GO: 0043169 | 0.02538840 | 1.59536467 | 29   |
| GO:MF  | copper-dependent protein binding            | GO: 0032767 | 0.00150380 | 2.82280992 | 2    |
| GO:MF  | GTPase activating protein binding           | GO: 0032794 | 0.00071500 | 3.14569396 | 9    |
| GO:MF  | molecular function                          | GO: 0003674 | 0.00060700 | 3.21681131 | 75   |
| GO:MF  | protein kinase inhibitor activity           | GO: 0004860 | 0.00041000 | 3.38721614 | 9    |
| GO:MF  | enzyme binding                              | GO: 0019899 | 0.00014100 | 3.85078089 | 100  |
| GO:MF  | kinase inhibitor activity                   | GO: 0019210 | 0.00012300 | 3.91009489 | 10   |
| GO:MF  | ubiquitin protein ligase binding            | GO: 0031625 | 0.00012100 | 3.91721463 | 50   |
| GO:MF  | protein binding                             | GO: 0005515 | 0.00000253 | 5.59687948 | 121  |
| GO:MF  | RNA binding                                 | GO: 0035198 | 0.00000203 | 5.69250396 | 87   |
| GO:CC  | nucleoplasm                                 | GO: 0005654 | 0.00200150 | 2.69864441 | 162  |
| GO:CC  | protein-DNA complex                         | GO: 0032993 | 0.00193170 | 2.71406032 | 18   |
| GO:CC  | extracellular exosome                       | GO: 0070062 | 0.00120300 | 2.91973437 | 41   |
| GO:CC  | cortical actin cytoskeleton                 | GO: 0030866 | 0.00073400 | 3.13430394 | 9    |
| GO:CC  | ribonucleoprotein complex                   | GO: 1990904 | 0.00028000 | 3.55284197 | 40   |
| GO:CC  | nucleus                                     | GO: 0005634 | 0.00022200 | 3.65364703 | 189  |
| GO:CC  | melanosome                                  | GO: 0042470 | 0.00021500 | 3.66756154 | 18   |
| GO:CC  | cytoplasm                                   | GO: 0005737 | 0.00008440 | 4.07365755 | 88   |
| GO:CC  | secretory granule                           | GO: 0030141 | 0.00008010 | 4.09636748 | 7    |
| GO:CC  | cytosol                                     | GO: 0005829 | 0.00001370 | 4.86327943 | 98   |
| GO:BP  | cellular response to hypoxia                | GO: 0071456 | 0.00015100 | 3.82102305 | 43   |
| GO:BP  | cellular response to tumor necrosis factor  | GO: 0071356 | 0.00014300 | 3.84466396 | 13   |
| GO:BP  | regulation of cell death                    | GO: 0010941 | 0.00013400 | 3.87289520 | 80   |
| GO:BP  | cellular macromolecule biosynthetic process | GO: 0034645 | 0.00013200 | 3.87942607 | 147  |
| GO:BP  | response to ionizing radiation              | GO: 0010212 | 0.00012500 | 3.90308999 | 20   |
| GO:BP  | regulation of protein kinase activity       | GO: 0045859 | 0.00007280 | 4.13786862 | 60   |
| GO:BP  | regulation of sprouting angiogenesis        | GO: 1903670 | 0.00001940 | 4.71219827 | 25   |
| GO:BP  | organelle organization                      | GO: 0006996 | 0.00000596 | 5.22475374 | 82   |
| GO:BP  | cellular process                            | GO: 0009987 | 0.00000068 | 6.16877031 | 86   |
| GO:BP  | biological process                          | GO: 0008150 | 0.00000066 | 6.18375870 | 60   |

Table S3. List of gene ontology keywords the (MF, BP and CC) of the DE mRNAs between BEAS-2B-Cr (VII) and BEAS-2B.

| Source | Term name                           | Term ID     | P value    | ES        | size |
|--------|-------------------------------------|-------------|------------|-----------|------|
| GO:MF  | small molecule binding              | GO:0036094  | 0.00000000 | 184.60601 | 636  |
| GO:MF  | metal ion binding                   | GO:0046872  | 0.00000000 | 233.25730 | 939  |
| GO:MF  | cation binding                      | GO:0043169  | 0.00000000 | 236.50131 | 955  |
| GO:MF  | nucleic acid binding                | GO:0003676  | 5e-324     | 312.48822 | 1052 |
| GO:MF  | catalytic activity                  | GO:0003824  | 5e-324     | 323.30622 | 1386 |
| GO:MF  | ion binding                         | GO:0043167  | 5e-324     | 323.30622 | 1409 |
| GO:MF  | heterocyclic compound binding       | GO:1901363  | 5e-324     | 323.30622 | 1515 |
| GO:MF  | organic cyclic compound binding     | GO:0097159  | 5e-324     | 323.30622 | 1536 |
| GO:MF  | protein binding                     | GO:0005515  | 5e-324     | 323.30622 | 3398 |
| GO:MF  | binding                             | GO:0005488  | 5e-324     | 323.30622 | 3770 |
| GO:CC  | nucleoplasm                         | GO: 0005654 | 5e-324     | 323.30622 | 1460 |
| GO:CC  | protein-DNA complex                 | GO: 0032993 | 5e-324     | 323.30622 | 1903 |
| GO:CC  | extracellular exosome               | GO: 0070062 | 5e-324     | 323.30622 | 2020 |
| GO:CC  | cortical actin cytoskeleton         | GO: 0030866 | 5e-324     | 323.30622 | 2878 |
| GO:CC  | ribonucleoprotein complex           | GO: 1990904 | 5e-324     | 323.30622 | 2878 |
| GO:CC  | nucleus                             | GO: 0005634 | 5e-324     | 323.30622 | 3102 |
| GO:CC  | melanosome                          | GO: 0042470 | 5e-324     | 323.30622 | 3131 |
| GO:CC  | cytoplasm                           | GO: 0005737 | 5e-324     | 323.30622 | 3285 |
| GO:CC  | secretory granule                   | GO: 0030141 | 5e-324     | 323.30622 | 3485 |
| GO:CC  | cytosol                             | GO: 0005829 | 5e-324     | 323.30622 | 4005 |
| GO:BP  | macromolecule metabolic process     | GO:0043170  | 5e-324     | 323.30622 | 2296 |
| GO:BP  | nitrogen compound metabolic process | GO:0006807  | 5e-324     | 323.30622 | 2428 |
| GO:BP  | regulation of cellular process      | GO:0050794  | 5e-324     | 323.30622 | 2492 |
| GO:BP  | primary metabolic process           | GO:0044238  | 5e-324     | 323.30622 | 2535 |
| GO:BP  | cellular metabolic process          | GO:0044237  | 5e-324     | 323.30622 | 2602 |
| GO:BP  | regulation of biological process    | GO:0050789  | 5e-324     | 323.30622 | 2609 |
| GO:BP  | organic substance metabolic process | GO:0071704  | 5e-324     | 323.30622 | 2644 |
| GO:BP  | biological regulation               | GO:0065007  | 5e-324     | 323.30622 | 2755 |
| GO:BP  | metabolic process                   | GO:0008152  | 5e-324     | 323.30622 | 2769 |
| GO:BP  | cellular process                    | GO:0009987  | 5e-324     | 323.30622 | 3741 |
